# Supplementary material for: Targeting immune checkpoint LAIR1 with antibody blockade or 3-in-1 CAR T cells enhances antitumor response
Source: J Clin Invest. 2025 Jul 1;135(16):e184043. doi: 10.1172/JCI184043 (PMC12352909; doi:10.1172/JCI184043)
Supplement: Supporting data values [file jci-135-184043-s013.xlsx]

## Sheet: Figure 1
Figure 1B
Tmem119+	CD45High	CD45low
47.3	55.2	11.3
46.4	69.8	11
37.8	71.3	11.8
69.1	79.8	7.4
47	81.9	21.5
38	82.4	27.5
74.8	85.6	23.2
66.8	87.5	30.8
Figure 1F
H Spleen	TB Spleen	Tumor
0.22	0.82	32.7
0.25	2.96	36.1
0.2	0.9	30.5
0.26	0.89	29.4
Figure 1G
M2-like MΦ	Other MΦ
27224	11528
13012	9225
16131	7557
21831	12216
Figure 1I
	M2-like TAM				CD4 T cells				CD8 T cells
H Spleen	1.42	3.85	0.77	1.6	0.15	0.52	0.36	0.64	0.24	0.4	0.5	3.63
TB Spleen	2.06	0.73	2.67	1.74	0.11	0.5	0.4	0.58	0.29	0.38	0.78	1.67
Tumor	96.23	96.46	95.3	98.34	0.78	0.44	1.08	0.43	0.15	0.29	0.05	0.07

## Sheet: Figure 2
Figure 2B
	LAIR1-/-	LAIR1+/+
76	1
84	1
89	1
92	1
94	1
99	1
101	1
103	1
69		1
72		1
75		1
77		1
81		1
82		1
86		1
89		1
Figure 2C
LAIR1+/+	LAIR1-/-
27.7	21.7
20.6	24.6
20.3	18
22.4	13.2
17	22.8
21.3	37.9
30.3	34.1
22.2	14.9
Figure 2E
	Lair1+/++CAR T									Lair1-/-+CAR T									Lair1+/++Ctrl T									Lair1-/-+Ctrl T
-1	0									0									0									0
13	18.35	66.89	86	183.25	-76.53	172.11	255.27	-57.21		45.05	-78.81	-50.19	-48.26	90.35	305.34	113.24	10.83	216.03	169.03	506.56	173.59	18624.7	1439.36	1271.35	3879.88	2302.82		-65.5	-0.93	5.68	31.83	14.3	-51.31	131.96	-87.13	255.88
34	918.31	-60.85	186.62	2093.4	251.12	1219.32	479.68	158.49		544.54	159.84	363.07	-47.46	10.95	456.38	520.46	-11.81	133.44	1109.72	9130.1	1986.41	7812.89	7808.65	3119.47	20832.3	18638.9		-87.99	287.4	516.85	165.71	4383.25	-75.31	326.79	50.59	1930.43
48	1487.44	-54.4	668.79	1817.38	942.6	2850.87	2263.38	662.69		-23.42	76.72	-78.9	-37.71	76.25	281.01	515.98	290.05	-32.39	5167.21	27292.8	17366	78889.6	9958.31	8832.97	11033.5	8601.78		-92.34	2869.59	4418.19	2179.02	7023.6	457.57	1232.76	178.47	797.37
Figure 2F
	Lair1-/-+CAR T	Lair1-/-+Ctrl T	Lair1+/++CAR T	Lair1+/++Ctrl T
112	1
118	1
85	1
96	1
97	1
137	1
141	1
101	1
96	1
63		1
75		1
97		1
97		1
82		1
77		1
69		1
96		1
102			1
89			1
78			1
82			1
100			1
93			1
99			1
84			1
70				1
72				1
59				1
82				1
62				1
60				1
68				1
65				1
79				1
Figure 2G
	Lair1+/++Ctrl T			Lair1-/-+Ctrl T			Lair1+/++CAR T			Lair1-/-+CAR T
All-MΦ	53.6	31.7	49	38.5	48.4	56.7	50.8	57.3	45.9	50.9	49	60.8
M2-like MΦ	29.5	24.7	30.8	8.8	10.1	12.8	27.6	39.1	33.6	3.1	7.2	11.8
Figure 2J
		Lair1+/+										Lair1-/-
All MΦ		64.4	61	66.3	69.4	62.1	66	60.7	58.1	50.6	69.8	59.6	58	63.8	68.1	55.2	26.6	55.3	43.1	65.2	46.1
M2-like MΦ		42.5	44.6	40.7	52.7	40.5	51.1	47.2	48.7	38	49.6	39.3	25.7	46.1	35.8	25.5	15.5	29.5	22.7	25	21.2
Figure 2K
		Lair1+/+										Lair1-/-
CD8+T		0.5	0.4	0.4	0.8	0.9	1.2	1.9	1	1.5	3.4	3.5	10.6	4	4.9	3.6	3.8	3.6	3.3	3.8	2
Act CD8+ T		0.3	0.2	0.4	0.4	0.5	0.6	1	0.8	0.6	1.6	2.5	9.3	2.8	4	2.5	2.9	2.4	2.5	3.3	1.3
CD4+T		1.4	1.7	0.8	1.9	1.5	0.7	1.4	2.4	1.4	2.6	1.3	1	1.4	1.4	1.8	2.9	2	1.3	2	5.2
Act CD4+ T		1.2	1.3	0.6	1.6	1.1	0.5	0.7	1.9	0.7	1.5	1	0.8	1.1	1.1	1.3	2.4	1.5	1	1.8	4.5
Treg		0.1	0.4	0.1	0.5	0.3	0.2	0.3	0.3	0.4	1.1	0.2	0.3	0.2	0.5	0.5	0.9	0.6	0.4	0.5	0.1
B		1.4	0.6	0.1	0.3	0.1	0	0.3	0.2	0	0.4	0.8	0.9	0.1	0	0.8	0.1	0.2	0.1	0.2	0.8
NK		0.2	1.3	0.3	0.3	0.2	0.1	0.7	0.3	0.4	0.1	0.2	0.9	0.3	0.4	1.2	1.5	0.3	0.1	0.6	0.1
DC		1.6	0.8	0.9	0.6	1.7	0.1	0.5	3.1	3.2	0.9	2.5	1	1.8	0.8	2	12.5	3	5.2	1.7	3.4

## Sheet: Figure 3
Figure 3B left
LAIR1 agonist	IgG	aLAIR1	PBS
30.2	35.1	30.6	39.2
33.1	32.6	31.6	26.2
30.7	28.9	35.6	36.7
28.9	29.2	33.2	28.6
Figure 3B right
LAIR1 agonist	IgG	aLAIR1	PBS
1.28	1.78	23.7	1.75
1.15	1.73	24.7	1.28
1.66	2.07	24.6	1.43
3	1.55	24.7	2.34
Figure 3C
M2+U87+CART+aLAIR1	M2+U87+CART+IgG	U87 only	CAR-T only	M2 only	U87+CART+aLAIR1	U87+CART+IgG
2.23869	0.88164	0.007097	0.022319	0.000622	1.80608	1.87166
2.9916	0.74249	0.022319	0.013601	0.020135	1.69335	1.41912
2.50465	0.666282	0.009261	0.026699	0.011429	1.78982	1.65371
2.30968	0.609747	0.020135	0.026699	0.017954	2.22548	1.86342
Figure 3D
CD3- Cells	CD3+ Cells	CAR T
14.4	0.056	0.2
12	0.07	0.21
19.3	0.069	0.13
23.4	0.056	0.17
Figure 3G
	CAR T | Tumor | M2-like MΦ with aLAIR1	CAR T | Tumor | M2-like MΦ with IgG
	65	38
	56	43
	50	45
	46	51
	63	50
	80	45
	65	48
	76	51
	74	54
	68	59
	69	57
	69	54
	68	50
	72	59
	63	53
	68	52
	90	50
	77	57
	95	47
	82	54
	82	54
	85	52
	105	53
	95	53
	84	56
	69	57
	71	58
	67	54
	62	46
	68	49
	67	50
	76	43
	72	46
	57	42
	66	41
	59	40
	63	47
	58	43
	59	42
	70	41
	61	45
	52	46
	54	42
	50	44
	54	46
	59	44
	52	45
	55	51
	52	46
	47	41
	57	45
	52	44
	51	45
	45	42
	41	46
	43	44
	42	44
	44	41
	43	46
	47	41
	49	46
	46	41
	49	45
	45	46
	60	46
	55	42
	59	44
	59	43
	57	41
	63	46
	61	43
	55	43
	67	42
	60	49
	64	45
	60	44
	55	49
	56	51
	62	52
	68	49
	71	55
	67	49
	62	46
	65	46
	75	49
	75	48
	71	50
	67	45
	68	49
	70	50
	71	55
	81	46
	77	50
	75	51
	76	48
	71	47
	72	50
	71	55
	69	56
	78	48
	75	49
	80	54
	70	54
	70	54
	83	54
	78	52
	84	51
	82	50
Figure 3H
	CAR T | Tumor | M2-like MΦ with aLAIR1	CAR T | Tumor | M2-like MΦ with IgG
	39.8673	19.3043
	34.825	30.6044
	22.7182	21.1758
	20.2892	13.4847
	30.7749	29.716
	44.2653	30.358
	9.86077	25.9293
	47.0354	23.9467
	36.6092	14.6485
	41.9616	50.0998
	25.4012	17.4351
	2.66218	38.506
	47.979	22.6437
	26.2493	47.4967
	29.3697	59.0581
	42.0662	3.51343
	20.8014	43.3129
	14.8868	63.1085
	49.1499	39.0938
	37.6294	23.1002
	30.671	21.8899
	26.5512	26.8555
	31.857	39.6708
	34.4311	46.8406
	17.4664	36.4796
	48.6297	40.99
	21.6055	37.1023
	59.2298	27.9811
	29.1519	38.7406
	45.2323	13.0912
	25.3415	30.9063
	30.2014	36.9036
	36.861	40.5994
	36.7854	19.6656
	38.8515	26.3483
	36.3462	49.8218
	34.4432	22.8049
	30.0172	28.6481
	55.0662	31.0082
	22.3001	29.0445
	50.2455	9.39094
	20.5245	26.291
	16.5421	36.6196
	27.9066	42.2235
	27.7746	43.8357
	26.8512	30.6118
	20.2819	15.2325
	12.443	13.9436
	23.8691	15.398
	35.101	20.5362
	26.295	41.899
	50.9287	37.9035
	67.5845	30.0767
	34.3964	64.8939
	45.8007	20.7776
	44.7815	32.2396
	36.4806	17.4015
	25.5698	15.9242
	19.4895	10.3781
	26.0498	47.1585
	37.1046	9.88704
	40.0803	20.8657
	7.4109	32.3464
	30.423	35.8012
	50.111	35.8451
	47.1499	36.9929
	43.5781	33.4156
	28.171	13.7318
	39.4496	13.1067
	35.2776	30.9811
	33.463	35.5881
	32.8038	45.8822
	22.2843	25.2963
	29.9051	29.1957
	21.9992	22.7955
	36.3053	35.5271
	56.6968	39.4837
	9.60046	13.4468
	18.9472	25.654
	49.9362	21.0263
	25.4376	25.2663
	37.7749	25.6578
	28.628	34.6825
	27.6975	5.74661
	44.8903	35.29
	22.3038	12.7943
	29.4008	2.69478
	13.4607	21.6542
	21.8421	21.1624
	98.6727	28.0395
	50.5642	14.4433
	31.4018	25.3508
	35.8227	25.9673
	50.0478	31.0039
	36.9231	9.2424
	43.1168	4.4237
	22.2824	20.0089
	36.9816	15.562
	23.8238	44.1785
	38.4976	46.6245
	47.2225	12.2267
	45.1178	30.0015
	29.7562	36.3594
	27.1124	27.8237
	43.1941	27.5939
	31.5021	18.7916
	23.9706	30.1618
	34.7413	1.07671
	32.0626	27.8244
	25.443	50.7708
	24.5148	38.2716
	23.9425	66.7169
	27.8983	44.4752
	50.0299	0.577055
	30.4745	14.6178
	51.0902	35.615
	55.6299	31.9588
	32.1784	47.3257
	36.6373	13.6155
	37.1533	23.1161
	34.1128	23.2677
	42.7383	49.4558
	34.9175	5.98799
	35.3717	9.65058
	27.076	13.2563
	29.4498	0.540257
	33.3881	13.5248
	44.0435	68.617
	38.8788	55.6182
	50.7927	25.5799
	23.6293	89.6355
	29.3794	23.4142
	26.4544	6.75391
	34.4948	40.1502
	44.3548	10.9668
	33.7941	2.16979
	27.9237	6.47655
	75.1637	18.9868
	17.069	62.7902
	56.5267	13.664
	27.3313	19.2156
	71.6351	9.12513
	46.4236	14.4724
	46.3861	11.9937
	19.4239	56.9627
	57.1683	14.7722
	53.2252	13.1452
	42.144	13.9592
	27.007	17.5018
	27.025	6.60046
	42.0128	26.1723
	52.3198	64.7869
	33.2794	4.58843
	20.0624	6.55315
	32.0724	1.50186
	18.1598	96.658
	61.4977	3.06667
	37.6463	11.4604
	35.0299	34.0946
	33.5001	11.9693
	40.5002	3.35128
	39.9759	3.91671
	33.7254	30.3983
	23.6886	0.905084
	44.3041	17.9944
	44.2585	34.5182
	53.021	8.27203
	4.58884	35.2038
	16.8896	1.69081
	25.4826	17.7833
	27.0725	14.9832
	46.8713	95.5455
	25.5967	8.14808
	53.7505	1.54584
	29.3338	22.9148
	37.9003	15.9385
	49.513	19.4489
	42.8839	25.1125
	24.3162	31.1463
	34.5077	15.2132
	22.6636	17.4263
	43.9215	15.8565
	19.267	33.2267
	15.1271	28.5467
	49.089	8.32567
	18.1185	13.4538
	27.1221	1.9976
	26.326	22.8928
	24.8204	17.7642
	31.9451	10.4367
	28.3147	24.1876
	33.0354	9.89155
	38.3586	11.175
	30.3383	12.9149
	18.2046	11.6863
	31.3522	7.84093
	31.8125	61.5965
	25.3341	28.1232
	45.9504	26.7362
	21.3923	72.6963
	20.3455	14.3034
	38.7912	75.3114
	46.5335	37.6295
	43.0565	14.9676
	70.1392	9.01571
	18.3977	6.43071
	19.3552	5.93321
	30.9326	23.6124
	64.2614	9.73446
	41.3488	7.13358
	79.9623	0.12299
	24.0431	36.3149
	24.4089	5.96956
	62.6414	10.7957
	12.4615	3.06293
	114.372	36.2028
	25.0726	20.7491
	24.6461	10.2356
	37.7747	10.4347
	28.8449	13.0531
	48.4708	8.18899
	6.20577	7.65932
	9.91731	6.05942
	76.0201	1.43718
	59.2604	19.0212
	77.6636	5.51582
	21.8037	13.8722
	29.0494	13.9074
	2.4599	49.0194
	17.3111	7.80202
	71.1745	29.7464
	26.417	12.2652
	27.6745	2.97778
	65.6929	15.7705
	33.772	35.3795
	40.0731	17.3497
	30.1385	9.86289
	17.3142	20.0167
	18.8533	13.6159
	22.5267	8.48563
	59.9453	22.575
	32.5612	16.454
	9.60265	20.5409
	22.3121	2.1296
	27.2404	2.91706
	24.3837	22.4279
	18.5409	26.9557
	90.9639	8.63821
	45.3705	80.0331
	5.93032	8.95777
	61.663	12.4734
	44.9971	17.4499
	9.11396	5.51222
	51.5249	6.05908
	29.8268	13.6367
	33.9086	4.29564
	22.2718	4.57698
	21.8169	11.5226
	20.9328	26.7216
	24.8397	5.29566
	15.5636	3.35215
	33.1375	5.74102
	24.1028	20.8915
	22.7175	68.4437
	25.6683	35.4434
	34.6977	12.1039
	2.08477	3.24634
	116.203	89.4508
	23.503	119.814
	23.4995	12.6444
	24.5329
	24.1967
	27.2161
	24.0745
	24.149
	17.4659
	44.8664
	29.363
	20.4767
	23.8604
	26.1896
	17.6442
	27.1459
	22.1209
	28.7694
	24.3816
	22.7181
	23.5042
	25.9181
	26.5783
	17.5749
	22.2161
	12.4375
	43.8161
	25.5083
	25.2709
	22.4354
	21.2504
	16.8471
	23.3947
	25.3408
	22.9874
	22.1924
	15.285
	24.3579
	17.9373
	25.2064
	28.4024
	21.2053
	34.2417
	7.13996
	21.732
	17.0728
	28.3276
	27.9681
	7.4292
	19.0136
	23.6816
	13.6813
	32.0949
	19.6259
	17.7035
	16.3895
	9.74379
	4.16809
	24.4717
	22.6896
	41.6817
	23.677
	3.86155
	91.2938
	2.4272
	0.516721
	26.5526
	21.9385
	24.2146
	23.403
	25.4323
	20.9864
	19.516
	28.9538
	23.1221
	20.4806
	16.3872
	27.2142
	31.8924
	22.606
	6.34002
	3.52359
	19.2478
	9.06556
	22.1152
	21.7656
	6.6678
	27.1123
	22.5491
	17.7735
	19.6243
	25.7886
	7.53381
	20.2533
	70.647
	10.6489
	15.9755
	16.1897
	24.3735
	23.5132
	40.2451
	28.4592
	15.3451
	16.399
	32.1498
	18.8277
	57.1661
	13.46
	18.4261
	6.70271
	5.43426
	4.7523
	1.15103
	36.1024
	38.4811
	4.93568
	49.5562
	8.47817
	18.8686
	0.660341
	5.81622
Figure 3I
	CAR T | Tumor | M2-like MΦ with aLAIR1	CAR T | Tumor | M2-like MΦ with IgG
0	0	0.925939
1	0	2.03718
2	6.47927	0
3	3.38703	0
4	3.94674	0
5	6.7885	2.28873
6	8.42911	1.5498
7	16.2207	0
8	9.58127	0
9	7.7381	2.6903
10	2.25636	1.63136
11	4.31364	2.32963
12	2.93347	7.36341
13	4.28436	6.90471
14	13.2699	1.27497
15	7.60304	4.42228
16	18.3821	2.16834
17	19.2829	3.03487
18	21.4154	3.60551
19	22.0677	0
20	28.2782	0
21	18.4858	1.65565
22	20.765	4.87804
23	19.6203	8.1479
24	22.6972	7.55264
25	37.3753	7.20523
26	36.6431	1.34695
27	30.9113	5.42663
28	40.5263	5.18306
29	34.2991	7.39273
30	28.6243	8.66784
31	34.7826	5.2038
32	26.8675	2.78273
33	53.8909	0
34	42.9355	2.38178
35	54.2358	7.83264
36	41.3752	8.20438
37	46.8144	12.8223
38	51.6677	7.87233
39	44.0528	3.24675
40	56.0968	6.55101
41	65.6538	1.3437
42	67.1988	11.6397
43	78.4522	6.47226
44	69.7449	10.7588
45	64.3074	6.33226
46	75.2659	13.5599
47	83.0853	11.8384
48	78.9409	13.6282
49	83.3843	15.3846
50	80.7633	13.1439
51	96.1634	19.9087
52	90.9421	18.1427
53	84.613	14.529
54	84.0233	16.7675
55	96.9939	12.6145
56	92.6543	19.2335
57	93.9801	25.6969
58	90.2723	24.3036
59	88.3706	20.3989
60	78.5224	17.268
61	80.8498	14.194
62	78.7673	17.7083
63	75.3519	18.8646
64	78.9407	19.8589
65	80.4598	25.2214
66	78.9263	18.3461
67	75.8643	25.4049
68	84.2317	26.5823
69	77.5024	20.3174
70	73.2769	21.1336
71	62.3673	13.1299
72	60.6443	26.6135
73	57.806	19.5771
74	76.7829	23.6363
75	72.3009	29.1816
76	77.3109	24.0274
77	61.7666	28.5407
78	62.1552	23.1879
79	70.6637	23.2781
80	74.8801	24.4883
81	65.7279	26.5321
82	57.2234	29.792
83	54.8705	29.2728
84	62.6852	21.5142
85	67.3854	23.337
86	68.6359	24.1451
87	61.6413	16.7188
88	64.4353	17.1691
89	66.3767	14.1493
90	73.7037	19.4524
91	69.4187	15.2711
92	72.7583	16.1877
93	79.1162	13.2789
94	65.5	13.476
95	70.877	20.6017
96	76.3955	16.1964
97	84.3779	18.6738
98	84.4451	17.4801
99	72.1975	22.0714
100	82.0698	22.0183
101	64.9877	27.8978
102	60.0879	30.8204
103	79.6616	27.9511
104	71.9935	21.7654
105	72.4785	25.8473
106	73.7639	25.5135
107	82.2393	19.9771
Figure 3J
time (h)	tumor area % (CAR T | Tumor | M2-like MΦ with aLAIR1)	tumor area % (NAS-T | Tumor | M2-like MΦ with IgG)
0	100	100
1	101.005	105.812
2	101.939	105.576
3	101.363	109.709
4	101.101	107.68
5	100.056	108.037
6	100.76	112.482
7	101.433	112.663
8	101.948	112.293
9	101.945	113.541
10	101.135	115.603
11	100.475	118.221
12	101.103	119.326
13	100.04	123.143
14	99.3821	123.27
15	99.1549	121.596
16	105.068	116.102
17	105.099	120.199
18	105.069	121.306
19	105.097	123.51
20	105.286	126.876
21	105.095	130.704
22	105.195	130.921
23	105.31	131.225
24	105.076	133.115
25	105.468	134.005
26	105.315	137.422
27	105.869	141.5
28	105.238	143.821
29	105.097	146.852
30	105.137	150.132
31	105.333	152.131
32	107.416	152.429
33	106.653	150.575
34	105.922	150.897
35	106.863	151.661
36	106.056	154.801
37	106.574	156.204
38	106.747	158.237
39	106.331	159.15
40	105.972	158.026
41	106.881	158.273
42	106.952	157.325
43	106.459	160.128
44	105.908	160.618
45	106.563	158.852
46	106.751	159.026
47	106.388	160.762
48	107.474	162.812
49	108.726	164.612
50	107.903	164.833
51	106.952	163.634
52	106.388	164.685
53	106.769	161.697
54	107.057	161.623
55	106.776	163.018
56	107.851	162.978
57	106.368	164.029
58	107.503	161.781
59	107.662	164.61
60	106.843	164.207
61	106.432	160.429
62	107.429	161.356
63	109.599	161.718
64	108.235	160.16
65	111.961	162.319
66	106.989	162.989
67	107.312	165.167
68	107.144	165.331
69	109.513	165.693
70	109.895	166.854
71	110.949	169.166
72	108.323	172.33
Figure 3K
	CAR T | Tumor | M2-like MΦ with aLAIR1	CAR T | Tumor | M2-like MΦ with IgG
0	19.3093	2.45697
1	14.6323	3.39089
2	17.3935	3.37796
3	14.9907	6.43756
4	11.5988	1.82161
5	8.93754	6.4747
6	10.2183	8.60907
7	7.40851	4.94021
8	8.8198	2.16123
9	10.3183	4.05426
10	8.98748	2.16369
11	8.62378	4.82901
12	15.5124	4.1634
13	8.46606	1.49091
14	7.82029	5.13822
15	10.4064	6.05346
16	12.6051	4.37835
17	10.9424	5.12152
18	7.82841	7.74007
19	13.152	5.47507
20	9.17652	6.93666
21	12.6366	5.81622
22	15.7735	4.05762
23	11.5819	2.81495
24	10.0146	6.34261
25	12.7658	4.619
26	11.1218	5.33389
27	14.0005	4.71973
28	12.3333	4.7054
29	12.4344	1.85441
30	17.1183	4.22555
31	16.0618	3.00606
32	12.3638	8.10848
33	16.8169	5.44152
34	15.0794	5.15606
35	18.2685	9.98078
36	17.2071	3.33657
37	11.2076	9.26561
38	12.9257	14.6903
39	13.6082	10.9046
40	14.4143	16.7505
41	8.61677	15.8982
42	11.2499	11.3324
43	10.4095	12.6076
44	7.24944	8.02859
45	11.2534	8.25243
46	8.66213	5.77777
47	10.0392	9.85994
48	13.9031	8.44993
49	7.61025	12.9163
50	7.62905	18.5017
51	8.21283	19.0831
52	5.99086	17.3339
53	7.22468	16.0316
54	5.14727	18.2087
55	5.03971	19.6324
56	6.38638	22.2144
57	7.56394	23.1848
58	4.21871	23.3083
59	6.31896	24.7158
60	5.80723	18.1893
61	5.87079	21.6915
62	7.47755	20.1644
63	6.07637	23
64	5.83171	22.9807
65	5.24662	23.0986
66	2.21955	22.5195
67	4.68298	21.6614
68	2.97457	21.7234
69	0.760695	23.2669
70	3.23759	22.3224
71	5.0811	28.8265
72	7.38174	31.1902
Figure 3L Upper
	CART + IgG	CAR T+ aLAIR1	CAR-T+M2+ IgG	CAR-T+M2+ aLAIR1	NAS-T+M2+IgG	NAS-T+M2+ aLAIR1
	1224.66	1340.89	313.339	1928.63	315.98	347.678
	1159.95	1327.68	265.791	1558.82	298.81	338.433
	1075.42	1115.04	228.81	1523.15	310.697	252.584
Figure 3L Downer
	CAR T+IgG	CAR T+aLAIR1	CAR-T+M2+ IgG	CAR-T+M2+ aLAIR1	NAS-T+M2+IgG	NAS-T+M2+ aLAIR1
	829.477	835.706	272.956	1042.67	277.801	316.564
	836.399	780.331	244.576	896.619	232.117	248.729
	715.957	842.628	282.647	922.23	252.19	299.259

## Sheet: Figure 4
Figure 4C
	Non-treated								IgG								aLAIR1								aPD1
-7	0								0								0								0
-1	152000	126000	17400	116000	40500	126000	117000	47200	102000	33700	73400	43100	40500	79800	64500	110000	57000	47900	103000	64000	86900	84500	33300	97400	23900	14900	126000	17300	124000	22400	48100	44500
7	419000	33200	42700	93100	227000	128000	87800	79100	147000	94600	86300	79600	73600	142000	47600	17700	123000	69600	8020	54800	94800	82700	79600	59200	57500	12500	87200	65400	14000	6410	130000	54700
14	1370000	4360	380000	419000	1580000	355000	644000	301000	469000	618000	994000	537000	392000	902000	270000	87000	430000	201000	406000	211000	649000	271000	311000	264000	68700	146000	4270	242000	318000	38800	43100	105000
21	3080000	1380000	646000	623000	2500000	783000	889000	1030000	681000	864000	1240000	1060000	974000	1200000	412000	185000	884000	233000	609000	369000	859000	624000	463000	469000	718000	15300	311000	492000
28	9380000	3520000	1110000	1120000	2170000	3550000	3210000	1540000	1360000	1990000	2260000	3490000	2770000	4590000	1470000	363000	1320000	439000	1340000	964000	1100000	1390000	751000	811000	1660000	107000	731000	1260000	1930000	588000	2470000	7470000
Figure 4D
	Non-treated								IgG								aLAIR1								aPD1
-1	0								0								0								0
7	176	-73.7	145	-19.7	462	10.3	-24.9	67.8	44.2	181	17.6	84.7	-7.76	120	-56.8	19.1	25.8	22.2	-83.3	-46.5	48.2	-4.84	-5.88	77.8	-54.3	-16.2	-29.5	192	-88.7	-71.4	171	22.9
14	802	-96.5	2080	262	3800	182	451	538	359	1740	1250	1150	391	1300	145	486	342	253	748	106	668	212	833	313	188	882	-75.3	386	157	73	-10.4	137
21	1930	994	3600	438	6070	523	661	2090	566	2460	1590	2370	1120	1760	274	1150	808	309	1170	260	916	618	1290	633	480	176	547	1010
28	6087.34	2689.68	6245.38	867.21	5265.79	2728.03	2648.5	3167.6	1232.68	5813.28	2976.4	7992.36	3369.98	7024.69	1234.85	2711.63	1257.57	669.57	2701.67	840.59	1196.73	1501.61	2154.65	1167.78	6843.05	619.87	4135.94	2421.6	1462.65	2522.77	5036.2	16703.1
Figure 4E
Days elapsed	IgG	aLAIR1	aPD1	Nontreated
55	1
57	1
57	1
58	1
66	1
70	1
73	1
76	1
68		1
71		1
72		1
73		1
75		1
77		1
86		1
88		1
67			1
67			1
68			1
69			1
69			1
70			1
72			1
78			1
54				1
54				1
55				1
57				1
67				1
68				1
70				1
72				1
Figure 4F
	IgG	aLAIR1
9	1
9	1
10	1
11	1
11	1
12	1
14	1
14	1
14		1
15		1
15		1
16		1
17		1
18		1
22		1
25		1
Figure 4H
	IgG										aLAIR1
-7		0									0
0		0	0	0	0	0	0	0	0	0	0	0	0	0	0	0	0	0	0
6		5	6.12	2.07	6	6.32	5.95	7.01	6.58	5.54	3.82	5.83	8.25	6.71	5.59	4.7	5.26	6.25	7.64
8		7.74	16.7	12.52	12.92	12.11	20.8	12.51	20.42	6.6	4.09	8.51	16.19	14.69	4.27	8.38	14.9	10.33	12.49
10		15.35	30.41	29.48	55.59	21.67	30.27	30.44	35.89	13.36	2.48	6.26	25.89	17.51	5.39	11.23	14.5	17.83	13.81
12		25.49	41.93	38.04	32.95	80.62	39.52	88.82	60.28	82.88	2.42	12.12	43.96	28.22	1.41	20.43	48.12	57.5	24.18
Figure 4J
aLAIR1+CAR T	aALIR1	CAR T	IgG	Nontreated
119.34	2302.12	1333.85	31193.6	35459.2
283.06	1023.64	4879.27	20694.9	21272.4
139.45	87.12	3836.66	9895.9	29579.5
758.36	7397.24	4772.02	30073	7949.08
30.32	1152.82	581.56	14023.8	48568.8
59.37	7326.52	3392.11	111028	32635.2
64.75	5759.63	1010.26	49877.2	81263.8
468.12	6035.07	589.91	27733.7	42795.6
Figure 4K
	aALIR1+ CAR-T	aLAIR1	CAR-T	IgG	Nontreated
71	1
76	1
88	1
85	1
88	1
95	1
120	0
120	0
62		1
68		1
70		1
72		1
78		1
80		1
85		1
86		1
61			1
65			1
71			1
72			1
74			1
76			1
78			1
82			1
55				1
57				1
58				1
60				1
61				1
65				1
68				1
69				1
53					1
54					1
59					1
61					1
62					1
63					1
68					1
70					1

## Sheet: Figure 5
Figure 5C
Time	LAIR2-8R70 CAR T cells			8R70 CAR T cells			untransduced T cells
0	0	0	0	0			0
6	15.1	13.1	12.27	1.02			1.05
7	12.61	11.31	9.84	0.82			0.79
8	15.9	10.43	12.57	1.92			1.8
9	12.26	8.89	9.67	1.19			0.66
11	8.24	7.05	7.34	0.61			0.13
13	9	8.11	7.91	0.82			0.19
14	11.74	7.68	9.55	0.51			0.02
18	6.52	6.63	6.88	0.39			0.03
22	6.16	4.74	5.57	0.73			0.03
27	9.7	7.55	7.45	0.76			0.16
Figure 5D
	L2-8R-70CART				8R-70CART				UTT
With U87	72.2	64.7	68.3	72.9	71.1	75.7	67.6	71.7	2.6	4.95	3.08	3.29
Without U87	6.32	6.41	6.68	6.97	8.76	9.3	9.89	4.13	0	0	0	0.034
Figure 5E
	L2-8R-70CART				8R-70CART				UTT
With U87	8.91	8.23	7.92	7.67	7.54	7.39	8.21	8.49	2.15	2.75	3.08	3.2
Without U87	2.12	2.38	2.27	2.37	3.11	2.87	2.47	2.18	0.76	0.82	0.86	0.97
Figure 5F
L2-8R-70CART+CD70+ hTumor(U87)	8R-70CART+CD70+ hTumor(U87)	L2-8R-70CART+CD70- hTumor(pGBM#1)	8R-70CART+CD70- hTumor(pGBM#1)	L2-8R-70CART	8R-70CART	CD70+ hTumor (U87)	CD70- hTumor(pGBM#1)
1205.82	1087.62	15.1732	13.551	14.9384	15.1732	15.1732	16.6034
1232.73	1002.58	14.2401	14.7046	15.8837	16.3625	16.1226	15.6459
937.557	1231.14	15.1732	15.6459	15.6459	16.3625	15.1732	14.4719
955.713	1040.28	15.8837	17.5772	15.409	16.1226	15.1732	14.9384
Figure 5G
L2-8R-70CART+mTumorCD70+	8R-70CART+mTumorCD70+	L2-8R-70CART+mTumorCD70-	8R-70CART+mTumorCD70-	L2-8R-70CART	8R-70CART	mTumor CD70+	mTumor CD70-
1946.22	1924.15	0	0	0	0	0	4.27586
1832.63	2133.16	0	0	0	0	0	0
1935.84	1905.33	0	0	0	0	0	0
Figure 5I
L2-8R-70CART	8R-70CART	No CART
-2.74	8103.17	393106
414.51	6495.07	159940
511.46	2370.92	111960
-72.79	4200.45	153048
1212.23	8372.57	123429
1858.22	3053.21	46912.5
-49.84	12527	17897.1
2184.23	6365.37	44425.3
Figure 5J
	Nontreated	8R-70CART	L2-8R-70CART
54	1
54	1
57	1
60	1
61	1
69	1
71	1
76	1
65		1
68		1
74		1
77		1
79		1
80		1
81		1
86		1
73			1
77			1
84			1
87			1
91			1
108			1
120			0
120			0
Figure 5K
Mouse ID	Treatment	Collagen I
1	Nontreated	162.1
1	Nontreated	176.3
1	Nontreated	282.2
2	Nontreated	301.5
2	Nontreated	356
2	Nontreated	374.2
3	Nontreated	391.2
3	Nontreated	647.3
3	Nontreated	670.1
4	8R-70CART	289.5
4	8R-70CART	302.2
4	8R-70CART	350.5
5	8R-70CART	376.5
5	8R-70CART	408.6
5	8R-70CART	436
6	8R-70CART	469.9
6	8R-70CART	526.7
6	8R-70CART	605
7	L2-8R-70CART	257.5
7	L2-8R-70CART	302.1
7	L2-8R-70CART	345.8
8	L2-8R-70CART	330.7
8	L2-8R-70CART	352.5
8	L2-8R-70CART	355.7
9	L2-8R-70CART	393
9	L2-8R-70CART	557.6
9	L2-8R-70CART	563.4
Figure 5L
Mouse ID	Treatment	Collagen IV
1	Nontreated	994.63
1	Nontreated	1042.8
1	Nontreated	1055.17
2	Nontreated	1330.91
2	Nontreated	1368.94
2	Nontreated	1391.34
3	Nontreated	1598.33
3	Nontreated	1711.3
3	Nontreated	1826.1
4	8R-70CART	980.95
4	8R-70CART	1089.12
4	8R-70CART	1141.81
5	8R-70CART	1138.85
5	8R-70CART	1229.7
5	8R-70CART	1278.17
6	8R-70CART	1334.17
6	8R-70CART	1415.54
6	8R-70CART	1541.36
7	L2-8R-70CART	13.92
7	L2-8R-70CART	19.1
7	L2-8R-70CART	40.55
8	L2-8R-70CART	40.88
8	L2-8R-70CART	105.1
8	L2-8R-70CART	108.51
9	L2-8R-70CART	120.27
9	L2-8R-70CART	150.59
9	L2-8R-70CART	154.78
Figure 5N
Mouse ID	Treatment	%CX8+CXCR2+
1	Nontreated	0
1	Nontreated	0
1	Nontreated	0
2	Nontreated	0
2	Nontreated	0
2	Nontreated	0
3	Nontreated	0
3	Nontreated	0
3	Nontreated	0
4	8R-70CART	0
4	8R-70CART	0.32
4	8R-70CART	0.72
5	8R-70CART	0.67
5	8R-70CART	0.92
5	8R-70CART	0.97
6	8R-70CART	0.95
6	8R-70CART	1.02
6	8R-70CART	2.02
7	L2-8R-70CART	5
7	L2-8R-70CART	5
7	L2-8R-70CART	5.91
8	L2-8R-70CART	7.99
8	L2-8R-70CART	8.15
8	L2-8R-70CART	9.5
9	L2-8R-70CART	10.91
9	L2-8R-70CART	12.78
9	L2-8R-70CART	17.63

## Sheet: Figure 6 
Figure 6B
Mouse ID
1	Lair1+/+	7.5
1	Lair1+/+	3.96
1	Lair1+/+	5.07
2	Lair1+/+	6.32
2	Lair1+/+	4.6
2	Lair1+/+	11.23
3	Lair1+/+	11.74
3	Lair1+/+	12.01
3	Lair1+/+	11.6
4	Lair1-/-	7.56
4	Lair1-/-	4.33
4	Lair1-/-	4.26
5	Lair1-/-	10.82
5	Lair1-/-	15.36
5	Lair1-/-	11.81
6	Lair1-/-	12.63
6	Lair1-/-	7.51
6	Lair1-/-	7.96
Figure 6D
Mouse ID	Treatment	Collagen IV
1	Lair1+/+	772.4
1	Lair1+/+	961.2
1	Lair1+/+	1139
2	Lair1+/+	1294.1
2	Lair1+/+	1691.9
2	Lair1+/+	1823.9
3	Lair1+/+	2639.7
3	Lair1+/+	2756.4
3	Lair1+/+	2890.6
4	Lair1-/-	45.3
4	Lair1-/-	74.9
4	Lair1-/-	89.1
5	Lair1-/-	102.1
5	Lair1-/-	107.1
5	Lair1-/-	171.5
6	Lair1-/-	187.1
6	Lair1-/-	413.2
6	Lair1-/-	424.2
Figure 6F
Mouse ID	Treatment	Collagen IV
1	aLAIR1	18.9212
1	aLAIR1	47.1646
1	aLAIR1	56.1383
2	aLAIR1	64.5725
2	aLAIR1	69.8059
2	aLAIR1	105.276
3	aLAIR1	159.491
3	aLAIR1	188.38
3	aLAIR1	196.891
4	IgG	233.5
4	IgG	361.2
4	IgG	410.5
5	IgG	583.3
5	IgG	717.4
5	IgG	806.1
6	IgG	946
6	IgG	965.6
6	IgG	1070.2
Figure 6H left
		IgG			aLAIR1
Non M2-like TAM		57.71	65.18	51.76	62.88	71.06	67.12
M2-like TAM		34.59	28.53	37.82	24	14.35	20.12
Figure 6H right
		IgG			aLAIR1
Naive CD8 T		1.12	1.06	2.65	2.12	5.29	3
Memory CD8 T		2.24	1.82	2.12	2.41	3.18	2.82
B cell		2.06	1.53	1.71	3.12	1.76	1.59
DC		0.94	0.59	1.29	2.41	1.71	1.94
Figure 6L
		WT				KO
+ FXIII-A		7583	6910	6911	6940	4743	4631	4894	4729
- FXIII-A		5943	5745	5512		4232	4727	4562
Figure 7N
+FXIII-A	-FXIII-A
27.9	18.2
20.8	8.4
18.2	11.3
29.2	12.4
34.1	4.9
27.2	11.1
22.8	8.9
26.9	18.4
21.3	12

## Sheet: Supplemental Figure 1
Supplemental Figure 1A
	LAIR1 High
PDCD1	7.3758	21.3034	31.7073	44.8685	9.6502	20.7326	11.807	13.7615	53.1501	18.6366	34.1833	30.4881	3.8722	17.9699	6.4034	105.536	12.5366	15.6822	6.5225	13.6032	14.2207	10.9126	3.2852	41.1172	12.3944	8.4014	23.012	12.1887	15.0517	5.8847	31.9197	6.941	8.844	14.1743	1.8108	1.5004	11.6724	4.3394	22.3496	6.8536	7.076	6.6516	15.083	19.2708	20.7745	8.6114	2.3956	10.2602	15.0054
CD274	15.9808	541.556	109.756	158.329	18.6972	14.5128	45.1745	36.6972	66.8958	41.1967	54.0317	39.3573	66.3117	32.5401	24.0128	9.2272	167.154	64.2969	43.6503	13.6032	9.1013	29.4639	16.8955	28.2421	31.5493	81.2137	40.9103	367.25	18.8147	77.6775	70.6794	172.534	195.831	24.9468	105.025	15.0038	25.5335	28.4474	29.7994	37.3832	13.7357	158.214	13.5747	21.3542	29.3553	66.7384	38.928	35.6663	20.3644
PDCD1LG2	36.8788	683.952	634.146	604.435	158.022	98.1341	147.844	279.817	273.539	307.994	329.704	311.533	78.4124	118.99	114.728	121.107	284.627	99.8432	104.861	100.405	111.49	93.3024	134.225	127.09	121.127	214.436	246.484	263.381	154.751	122.009	215.23	291.522	513.582	238.129	885.468	271.568	276.491	261.813	150.716	219.938	84.4953	582.967	263.952	121.354	304.844	221.206	137.146	234.518	129.689
CTLA4	12.2929	21.3034	26.2195	45.3842	7.2376	3.4554	31.8275	18.3486	38.488	9.8087	11.0269	12.1952	4.3562	1.457	12.8068	9.8039	17.1798	12.5457	1.0035	14.251	7.3948	10.9126	7.9784	26.1655	15.7746	0.8001	30.6827	13.7785	11.7592	3.5308	47.8796	6.4452	19.5831	9.6386	4.2251	12.003	13.1315	7.7146	17.192	15.5763	7.4922	3.3258	13.5747	5.7292	48.3234	17.2228	1.1978	6.3515	10.7181
TIGIT	21.5126	7.288	26.8293	82.001	7.8408	0.6911	13.8604	9.1743	51.3173	3.9235	13.2323	22.1731	4.3562	20.8839	5.3362	7.4971	23.2159	6.7956	20.5708	21.3765	6.2571	3.8194	4.2239	33.6414	2.8169	2.8005	7.6707	16.9581	13.1703	3.1385	7.7519	1.9831	8.844	6.8037	1.2072	2.2506	5.1067	3.3751	27.5072	17.4455	9.5734	9.5023	43.7406	13.5417	10.3873	9.6878	1.7967	5.3744	16.0772
LAG3	22.7419	30.8339	97.561	270.242	18.6972	32.481	27.7207	22.9358	103.551	19.127	34.1833	39.9116	16.4569	25.7407	17.0758	40.3691	17.1798	31.8871	47.1624	33.0364	22.7531	13.6407	11.2636	84.7264	24.7887	10.4018	9.7162	8.4791	16.4628	4.7077	78.8874	13.882	12.0025	30.0496	6.6395	9.7524	11.6724	1.9286	331.232	21.8069	38.7097	28.0318	122.172	47.9167	40.1942	22.0667	15.5712	56.1866	36.4416
Supplemental Figure 1B
Normal Brain	GBM
0.7	35.3
0.8	16.1
5.9	66
0	27.3
0	67.1
Supplemental Figure 1D
EGFR+	CD45+
0	99.5
2.5	84.8
0	87.9
0	81.6
0	99
[truncated: 111 more columns]

## Sheet: Supplemental Figure 7
Supplemental Figure 7A
	LAIR1-His tag
-1.69897	3.095	3.095	3.133
-1.30103	6.074	5.996	6.074
-1.04576	8.317	9.014	8.549
-0.72125	12.186	12.65	12.07
-0.42022	19.961	20.232	20.503
-0.12494	35.977	35.048	37.524
0.176091	60.851	64.99	63.907
0.477121	100.812	98.994	96.905
0.778151	103.366	101.857	94.816
1.07918	100.542	105.145	103.559
1.38021	105.687	93.81	99.265
1.68124	116.402	103.482	100.426
1.98227	100.542	105.145	103.559
2.2833	103.366	101.857	94.816
Supplemental Figure 7B
	aLAIR1			IgG			LAIR1-His tag only with Collagens coated
2.2	1.695	1.695	1.695	1.965	1.695	1.695	100	102.234	101.772
1.9	1.695	1.695	1.695	1.695	1.695	1.733
1.6	1.695	1.695	1.695	1.695	1.695	1.695
1.3	1.695	1.695	1.695	1.695	1.656	1.656
1	1.656	1.695	1.695	1.656	1.656	1.695
0.7	1.695	1.656	1.656	1.656	1.656	1.656
0.4	1.772	1.695	1.733	1.656	1.656	1.656
0.1	1.695	1.695	1.695	1.695	1.695	1.695
-0.17	1.695	1.695	1.733	1.695	1.695	1.695
-0.47	1.695	1.695	1.695	1.695	1.695	2.542
-0.77	1.733	1.695	1.695	1.849	1.695	1.733
-1.17	1.656	1.695	1.695	1.695	1.656	1.733
-1.47	1.695	1.656	1.656	1.656	1.695	1.656
-1.77	1.656	1.695	1.656	1.656	1.656	1.656
-2.17	1.695	1.695	1.695	1.656	1.656	1.656
Supplemental Figure 7C
	aLAIR1			IgG
2.6	77.9893	78.2272	79.8929	-0.77335	-0.29744	0.257783
2.3	80.0516	79.4567	78.5445	-0.37676	-0.05949	0.019829
2	78.5049	77.91	78.1479	-0.37676	0.019829	-0.05949
1.7	78.4255	78.2272	78.9411	0.019829	-0.17847	0.416419
1.4	73.2302	77.672	77.0375	-0.09915	-0.13881	0.059488
1.1	73.1112	73.1112	73.3095	-0.01983	0.257783	0.535396
0.8	55.0268	53.6784	53.4008	0.138806	0.575055	0.654372
0.5	11.7589	10.9657	9.2207	0.416419	0.456078	0.73369
0.2	-1.36823	-1.09062	-1.44755	-0.05949	0.535396	0.654372
-0.1	-0.21812	-1.0113	-1.05096	0.456078	0.694031	0.852667
-0.4	-0.69403	-1.2096	-1.24926	-0.13881	0.614713	0.773349
-0.7	-1.0113	-0.49574	-0.69403	0.138806	0.575055	0.495737
-1	-0.17847	-1.05096	-0.45608	-0.01983	0.456078	0.37676
-1.3	-0.29744	-0.09915	-0.13881	0.495737	0.813008	0.575055
-1.6	-0.3371	-0.41642	-0.49574	0.535396	0.892326	0.37676
-1.89	-0.09915	-0.13881	-0.17847	0.773349	1.24926	0.773349

## Sheet: Supplemental Figure 8
Supplemental Figure 8A
	NAS T | M2 with aLAIR1	NAS T | M2 with IgG
	53	101
	40	71
	30	43
	39	46
	44	38
	50	31
	47	28
	51	22
	53	20
	50	19
	44	13
	54	18
	54	15
	41	16
	34	23
	36	22
	26	27
	30	20
	29	17
	25	16
	34	18
	27	16
	29	15
	37	13
	34	14
	34	14
	41	16
	38	14
	40	14
	31	11
	37	11
	29	12
	33	12
	32	12
	31	12
	26	10
	36	11
	27	10
	27	10
	26	9
	26	11
	24	13
	24	10
	20	9
	21	11
	24	13
	23	11
	25	12
	28	11
	22	17
	23	13
	19	11
	16	15
	18	15
	18	10
	15	10
	22	10
	18	9
	14	15
	15	12
	12	16
	15	13
	12	13
	13	11
	11	11
	16	13
	14	13
	18	11
	16	13
	18	12
	13	15
	15	14
	15	12
	18	10
	18	12
	18	10
	14	12
	14	13
	12	12
	16	11
	14	14
	15	15
	15	15
	14	14
	15	15
	15	16
	14	12
	16	17
	11	17
	15	13
	14	16
	17	16
	16	16
	17	14
	17	17
	16	15
	15	14
	16	14
	16	14
	13	13
	12	15
	12	12
	11	12
	10	10
	14	9
	15	9
	14	9
	14	7
Supplemental Figure 8B
	NAS-T | Tumor | M2-like MΦ with IgG	NAS-T | Tumor | M2-like MΦ with aLAIR1
	10.4168	14.4211
	19.717	21.4016
	11.5208	52.7159
	32.1975	21.0079
	28.2911	11.6046
	31.0049	37.4126
	7.11012	51.2089
	57.8551	18.6353
	51.2993	39.9724
	22.297	11.6697
	45.3296	11.188
	25.303	48.6313
	74.9421	21.3125
	6.26448	7.29728
	22.7386	37.6726
	36.0535	40.5576
	69.457	81.4158
	42.2295	59.4715
	49.479	28.4679
	42.6154	50.4531
	58.547	36.5565
	22.7455	70.3405
	32.0266	85.8829
	49.3404	13.3879
	57.4025	44.3212
	59.7364	15.683
	42.562	54.646
	23.36	32.3916
	71.0366	34.5717
	62.7877	13.8303
	40.8576	35.2169
	42.046	17.6847
	44.1504	48.7687
	4.77566	27.4612
	15.8438	26.7318
	28.2153	32.6155
	25.8186	15.0443
	50.8192	25.4945
	48.9096	11.2197
	57.7825	24.7168
	28.4906	27.7778
	61.0093	16.5132
	50.2469	6.94874
	30.6364	36.0755
	58.9334	1.46125
	84.9667	23.095
	18.8652	21.0714
	75.5545	23.134
	6.69617	17.6898
	6.69133	28.9204
	2.61169	14.0225
	10.4178	39.2591
	24.099	33.7599
	63.9355	22.7592
	43.0256	23.2979
	43.0577	66.7548
	50.657	28.8062
	37.4156	51.0542
	73.5176	26.8509
	11.148	9.32217
	18.299	16.8672
	79.0074	99.3532
	10.1205	48.0465
	29.6841	19.8278
	53.3219	126.915
	21.2323	3.55488
	3.52936	25.8308
	124.102	9.05687
	8.80614	20.7821
	15.5417	24.1869
	16.1497	32.3688
	1.62955	89.5881
	25.2306	7.64531
	44.7278	58.023
	94.8492	34.7228
	56.6823	9.36206
	55.4676	16.4805
	24.1805	10.1949
	20.0692	15.6322
	36.7488	17.3371
	24.4521	19.3826
	86.3443	25.0553
	24.2388	43.2296
	13.1253	23.091
	42.9102	5.17122
	20.5747	19.3104
	37.9316	1.40286
	4.57246	23.2104
	140.449	62.4656
	3.47729	22.7178
	5.41533	38.2504
	53.3822	12.0118
	1.34746	22.3513
	4.03199	4.9865
	9.33635	33.3301
	3.4955	36.5317
	20.2625	71.9473
	2.40452	46.7284
	5.57951	0.401075
	4.94232	60.8832
	28.5099	144.899
	12.3573	27.804
	31.4004	2.43458
	8.33592	8.64809
	12.4045	6.42206
	9.03344	0.57193
	43.7011	15.1895
	5.40656	9.05211
	13.4236	16.4408
	15.8776	0.523987
	1.96324	24.2119
	12.4687	5.63871
	9.01122	66.5067
	25.5576	16.7249
	3.64392	140.632
	4.77617	49.3003
	4.9965	6.32933
	51.3766	17.8837
	6.97998	7.70978
	69.6264	37.5685
	46.7799	10.471
	53.8799	46.1146
	37.1546	24.7333
	23.2379	13.73
	19.3	24.9237
	43.8438	41.1161
	28.1489	33.8502
	69.9087	52.5743
	82.6507	24.1348
	20.4957	72.5856
	30.0695	13.1965
	24.8882	16.1023
	56.4342	30.5548
	11.7484	4.09779
	4.56122	129.616
	122.945	8.53125
	46.7895	12.9236
	88.6187	19.9474
	42.4542	10.0418
	71.6249	1.52863
	39.3608	55.3812
	16.6767	21.4498
	12.5598	4.43345
	8.81252	22.1353
	3.07358	20.3304
	2.53651	19.2382
	0.671165	8.65723
	4.64092	42.818
	5.74085	23.2474
	1.26976	19.1563
	4.68925	10.8695
	11.5011	72.1169
	7.176	8.08004
	3.17731	5.7099
	18.9231	25.7378
	1.47935	34.1454
	3.01118	60.8722
	17.3042	0.434597
	30.7445	5.98027
	8.57297	20.8315
	5.94125	35.5065
	4.73117	10.5754
	4.92764	50.6737
	4.34285	4.80894
	3.98657	113.378
	8.82505	4.39517
	0.429285	35.1137
	4.64657	84.5336
		24.7683
		12.3293
		104.888
		7.49073
		12.8004
		25.389
		44.7022
		60.9256
		71.8189
		22.0315
		13.3416
		55.5473
		21.6224
		3.42627
		51.1529
		8.72282
		15.6095
		5.78699
		50.2904
		21.8722
		13.0353
		5.22681
		27.5656
		0.97234
		24.7094
		30.1687
		3.11798
		90.234
		87.7907
		32.7125
		2.08513
		22.8726
		8.70509
		35.0247
		7.30581
		20.5703
		71.4777
		31.0543
		99.245
		56.2256
		5.89633
		2.39165
		72.9893
		119.746
		3.9958
Supplemental Figure 8C
	NAS T | M2 with aLAIR1	NAS T | M2 with IgG)
0	12.9128	9.51162
1	10.035	11.089
2	6.14709	14.6326
3	14.7503	10.8356
4	9.38475	10.8848
5	2.3093	14.8389
6	2.69589	7.99712
7	3.7061	1.67754
8	2.84462	6.9053
9	2.69379	5.47517
10	3.82424	6.72441
11	3.88941	7.2686
12	1.10246	0.467326
13	3.24811	1.25443
14	4.42828	6.64752
15	2.07378	1.3952
16	2.86842	2.04144
17	3.26685	12.3031
18	1.5733	11.2389
19	0.606343	7.31711
20	2.7939	6.15161
21	1.46561	8.52043
22	0.783972	12.9723
23	1.25315	1.11446
24	0.943396	13.3333
25	3.71217	11.2837
26	0.729803	8.3014
27	4.28436	4.38805
28	1.35843	8.21619
29	1.25	12.0209
30	1.47729	8.74317
31	6.14681	17.4436
32	2.40816	22.1818
33	3.10845	10.4295
34	7.46271	8.68327
35	2.92569	9.58911
36	4.26529	11.8996
37	4.8092	7.94551
38	3.9739	22.4052
39	3.19521	26.0965
40	3.70816	16.6344
41	2.15947	24.6363
42	5.41534	19.8962
43	5.38345	28.3854
44	3.68373	25.9465
45	1.81612	29.8643
46	0.134862	37.4891
47	0.266134	29.7758
48	2.61032	40.2439
49	5.97941	23.5522
50	0.686845	26.9384
51	4.59268	22.7106
52	3.95622	41.4634
53	0.738676	22.9187
54	0.485437	25.066
55	0.606061	17.8935
56	0.389484	17.3622
57	3.70844	38.9509
58	0.938234	32.8721
59	3.14098	34.7001
60	4.57454	22.2565
61	0.892913	33.6274
62	1.02041	24.8555
63	0.800062	19.5906
64	0.320929	21.1429
65	5.11416	41.974
66	2.49314	39.1305
67	9.92623	37.0812
68	4.18295	36.805
69	3.93939	31.4643
70	0.334899	31.1554
71	3.1101	31.5544
72	0.347222	43.3107
73	0.400267	47.7816
74	0.937543	26.5194
75	0.349455	34.0775
76	0.21575	43.0047
77	0.73925	57.9644
78	0.113586	52.2019
79	0.310559	53.3467
80	0.528169	50.9694
81	0.481298	55.2265
82	0.359066	54.1668
83	0.441368	58.5749
84	0.415685	63.0017
85	3.72671	65.396
86	5.88829	70.3855
87	0.656506	58.7249
88	0.827505	68.6725
89	0.441176	71.7278
90	0.51767	75.8524
91	0.727802	78.6409
92	0.233335	79.4118
93	0.666112	81.8559
94	2.72109	73.1951
95	0.176211	75.981
96	0.108183	76.6566
97	0.080571	74.1643
98	0.308404	68.3839
99	5.53634	74.7128
100	4.7619	62.8
101	1.01754	81.0418
102	7.57576	73.7317
103	1.08538	74.3316
104	6.92308	78.3934
105	5.12163	83.2554
106	0.437637	77.4011
107	1.51188	80.7229
Supplemental Figure 8D
	NAS T | M2 with aLAIR1	NAS T | M2 with IgG
0	4.16762	19.6638
1	9.45249	11.089
2	12.9894	17.7796
3	6.10358	15.4887
4	3.75674	12.5186
5	8.6024	9.84262
6	9.22861	17.5405
7	5.27447	16.6822
8	7.37154	13.5936
9	7.29345	13.2968
10	6.67427	16.8443
11	10.9357	13.3447
12	9.76634	5.39979
13	1.4651	8.93126
14	3.11562	8.53509
15	2.21624	19.1931
16	11.7802	34.4971
17	13.0923	17.3669
18	24.5769	39.9116
19	12.8032	42.7101
20	9.03483	16.3878
21	7.15804	19.7467
22	7.44774	10.3905
23	9.11897	10.7727
24	4.8242	18.6395
25	5.12237	20.1963
26	15.6624	16.3474
27	14.7488	21.863
28	17.116	28.8675
29	12.05	29.7909
30	11.1818	11.1632
31	13.208	18.4211
32	14.3878	39.7273
33	17.0121	36.547
34	25.1202	28.1489
35	17.7882	33.4247
36	25.334	32.4237
37	15.2379	16.6856
38	17.2895	23.7975
39	18.1272	34.5395
40	12.4402	38.4913
41	12.8738	36.8574
42	24.3078	29.9308
43	33.7735	16.4062
44	29.7642	33.4257
45	25.8797	31.3122
46	21.9825	36.3477
47	19.6274	31.5695
48	22.5368	41.6667
49	21.4846	49.8842
50	31.044	39.5533
51	20.7764	35.1649
52	34.6318	52.0325
53	26.5909	49.0696
54	37.6214	55.2771
55	31.3636	50.6346
56	30.3797	55.4509
57	30.3709	34.0223
58	28.0689	51.7879
59	34.1256	54.2
60	34.5745	64.3077
61	34.6591	61.5215
62	32.1429	58.7669
63	41.9556	51.6083
64	32.1926	57.5715
65	33.79	56.6161
66	43.8597	63.8648
67	35.521	63.892
68	34.5331	58.6938
69	46.4394	65.7322
70	33.2589	62.6894
71	40.5902	67.3222
72	35.5035	69.5012
73	27.8186	77.8158
74	32.1875	73.7018
75	41.9287	78.1251
76	33.9807	86.573
77	20.5914	62.0824
78	29.6255	78.3488
79	41.8479	77.2229
80	47.8873	80.0485
81	32.5313	80.0523
82	37.3429	84.6265
83	21.8006	86.1395
84	35.9102	87.8813
85	41.7185	85.5572
86	38.1238	95.2333
87	30.197	95.5035
88	34.9882	95.9452
89	34.9265	96.1108
90	34.058	91.4774
91	47.4527	93.9509
92	24.5723	88.6555
93	32.3898	92.7921
94	29.6296	89.0938
95	38.5022	91.1963
96	37.4054	78.3894
97	46.6989	88.1461
98	49.1905	84.0405
99	34.3714	79.9374
100	21.5609	87.7001
101	16.5698	80.6251
102	15.404	85.2313
103	13.9535	88.2353
104	37.5962	92.6594
105	31.3701	94.4966
106	27.1335	95.6216
107	35.8531	91.717
Supplemental Figure 8E
Time (hours)	NAS T | Tumor | M2-like MΦ with aLAIR1	NAS T | Tumor | M2-like MΦ with IgG
0	100	100
1	102.005	101.605
2	102.494	101.099
3	102.131	102.441
4	101.909	104.941
5	101.236	103.934
6	101.231	103.763
7	100.743	104.409
8	98.1335	104.984
9	99.1192	105.364
10	99.8237	106.444
11	98.8568	105.994
12	96.8365	106.359
13	95.7281	107.582
14	94.7617	109.175
15	96.1702	111.109
16	102.104	113.802
17	104.677	116.096
18	106.088	116.707
19	106.95	116.346
20	107.671	116.491
21	108.665	116.11
22	110.457	116.638
23	113.466	120.312
24	115.617	123.028
25	114.631	122.944
26	115.947	122.993
27	116.665	123.052
28	117.086	124.626
29	116.68	128.281
30	117.089	129.741
31	117.618	130.786
32	118.321	132.509
33	119.304	134.698
34	118.936	134.562
35	118.75	136.983
36	118.285	137.226
37	119.247	135.645
38	119.506	136.853
39	119.339	136.978
40	119.41	137.089
41	119.058	136.066
42	120.013	137.299
43	120.967	137.689
44	121.373	137.87
45	121.046	138.088
46	121.589	138.225
47	121.76	138.878
48	122.578	140.09
49	124.986	140.609
50	125.139	142.355
51	126.217	142.186
52	127.628	143.001
53	128.993	143.737
54	129.304	145.096
55	129.794	146.328
56	130.432	147.307
57	129.271	146.527
58	128.948	147.131
59	129.896	148.02
60	129.877	146.626
61	129.147	146.613
62	129.418	148.173
63	129.272	147.712
64	129.544	147.531
65	129.489	146.959
66	129.19	146.462
67	128.712	147.434
68	128.101	147.973
69	128.68	148.181
70	128.746	147.712
71	127.871	147.168
72	128.706	147.957
73	128.268	146.678
74	129.006	145.966
75	128.615	145.478
76	129.178	144.364
77	129.528	143.622
78	129.431	144.681
79	129.053	143.852
80	129.932	143.152
81	130.65	141.168
82	131.189	140.538
83	130.063	139.857
84	129.538	137.956
85	128.867	138.133
86	128.761	137.749
87	128.215	137.313
88	128.219	137.615
89	126.714	137.307
90	126.515	138.004
91	127.247	136.616
92	126.479	135.788
93	126.86	136.616
94	125.828	135.947
95	126.385	135.919
96	126.813	135.968
97	126.221	136.16
98	126.541	136.082
99	127.006	135.962
100	126.885	135.5
101	126.09	135.393
102	125.75	135.054
103	125.855	135.18
104	126.593	135.172
105	126.148	135.982
106	125.888	134.97
107	124.797	135.797

## Sheet: Supplemental Figure 9
Supplemental Figure 9B
Mouse ID	Treatment	Collagen IV
1	aLAIR1	96.2
1	aLAIR1	107.2
1	aLAIR1	126.5
2	aLAIR1	142.7
2	aLAIR1	158.8
2	aLAIR1	204.4
3	aLAIR1	366.1
3	aLAIR1	387.7
3	aLAIR1	394.2
4	IgG	536.6
4	IgG	613.1
4	IgG	643.3
5	IgG	693.1
5	IgG	1037.2
5	IgG	1095.6
6	IgG	1366.8
6	IgG	1434.2
6	IgG	1829.7

[truncated: 4 more sheets: Supplemental Figure 11, Supplemental Figure 13, Supplemental Figure 14, Supplemental Figure 19]
